# Supplementary material for: Genetic Deletion of GABAA Receptors Reveals Distinct Requirements of Neurotransmitter Receptors for GABAergic and Glutamatergic Synapse Development
Source: PubMed Central journal article supplement (PMC6558517; doi:10.3389/fncel.2019.00217), 2019-06-04
Supplement: Data_Sheet_1.pdf [file Data_Sheet_1.pdf]

**Genetic deletion of GABA<sub>A</sub> receptors reveals distinct requirements of neurotransmitter  
receptors for GABAergic and glutamatergic synapse development**

Jingjing Duan, Saurabh Pandey, Tianming Li, David Castellano, Xinglong Gu, Jun Li, Qingjun

Tian, Wei Lu

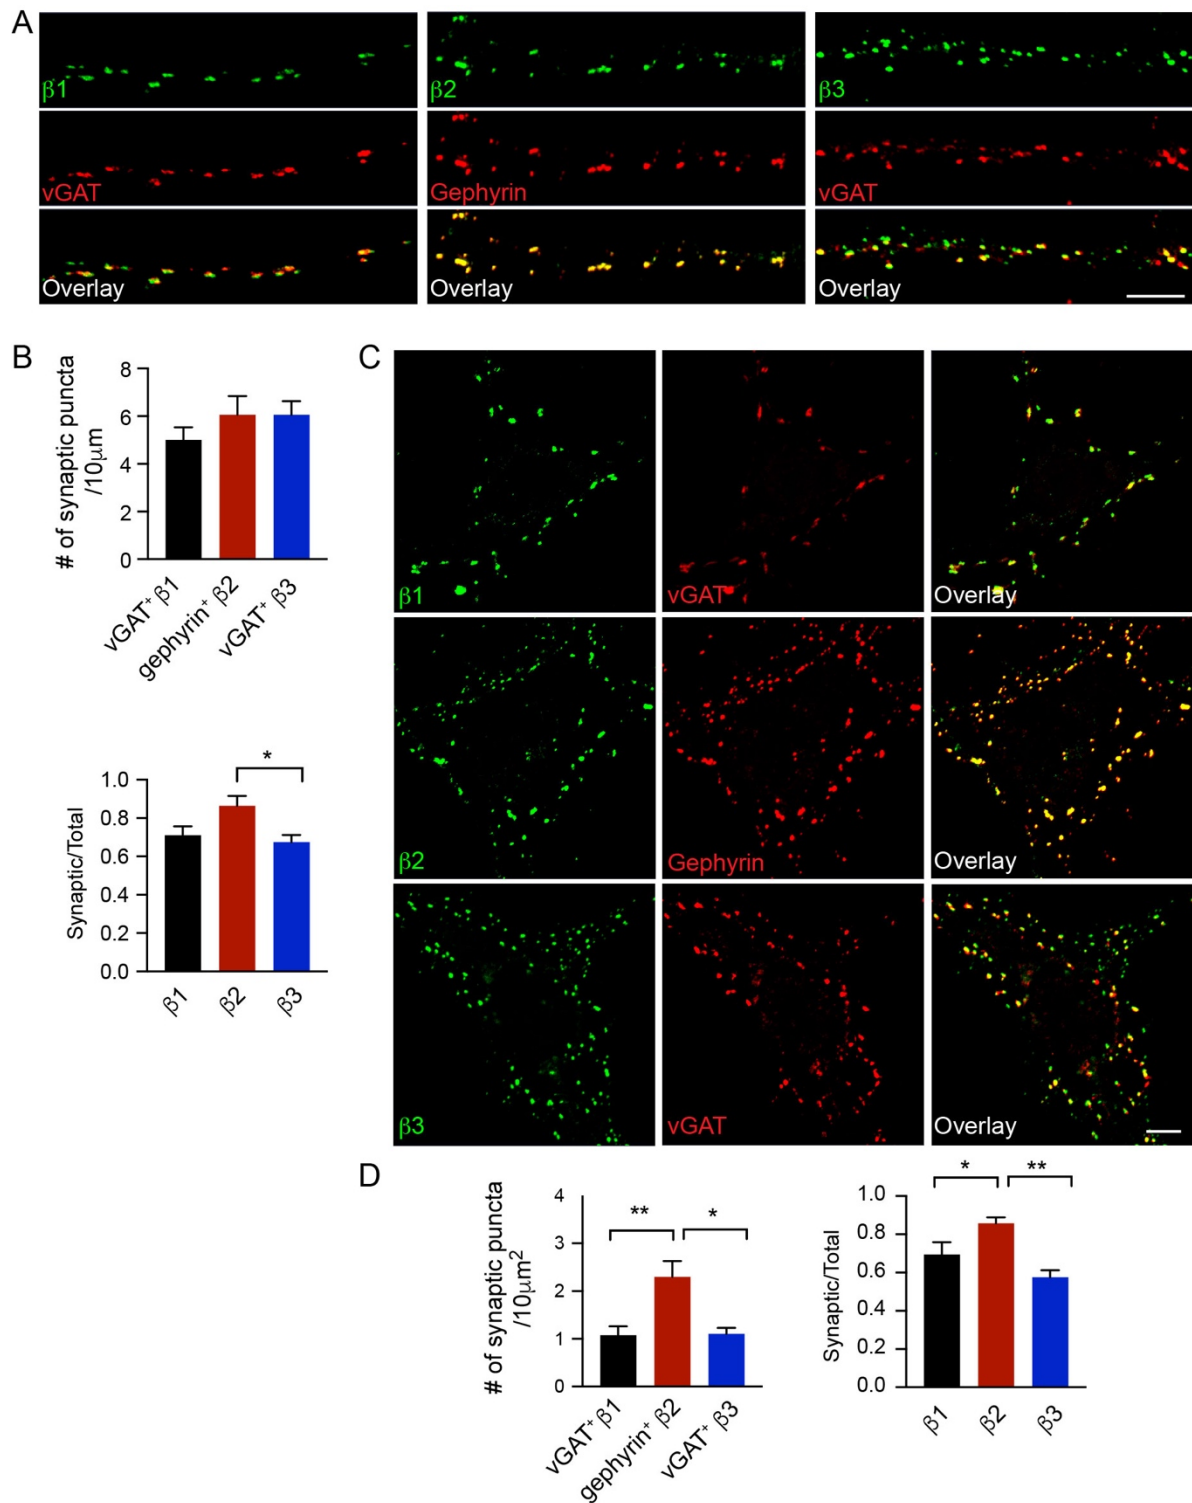

**Figure S1. Subcellular distribution of the GABA<sub>A</sub>R  $\beta$ 1-3 subunits in hippocampal neurons.**

(A-B) Representative images and summary graphs showed dendrites of neurons at DIV 18 immunolabelled with GABA<sub>A</sub> receptor  $\beta$ 1, 2, or 3 subunits (green) and synaptic marker gephyrin/vGAT (green). Synaptic GABA<sub>A</sub> receptor  $\beta$  subunits (indicated by co-localization with gephyrin or vGAT) was calculated (n = 15; N = 3, \*p < 0.05, one-way ANOVA followed by Bonferroni's post-hoc test). Choice of gephyrin or vGAT depends on antibody compatibility. Scale bar, 5  $\mu$ m.

(C-D) Representative images and summary graphs showed somata of neurons at DIV 18 immunolabelled with GABA<sub>A</sub> receptor  $\beta$ 1, 2, or 3 subunits (green) and synaptic marker gephyrin/vGAT (green). Synaptic GABA<sub>A</sub> receptor  $\beta$  subunits (indicated by co-localization with gephyrin or vGAT) was calculated (n = 10 - 15; N = 3, \*p < 0.05, \*\* p < 0.01, one-way ANOVA followed by Bonferroni's post-hoc test). Choice of gephyrin or vGAT depends on antibody compatibility. Scale bar, 5  $\mu$ m.

n represents the number of cells analyzed and N represents the number of independent experiments.

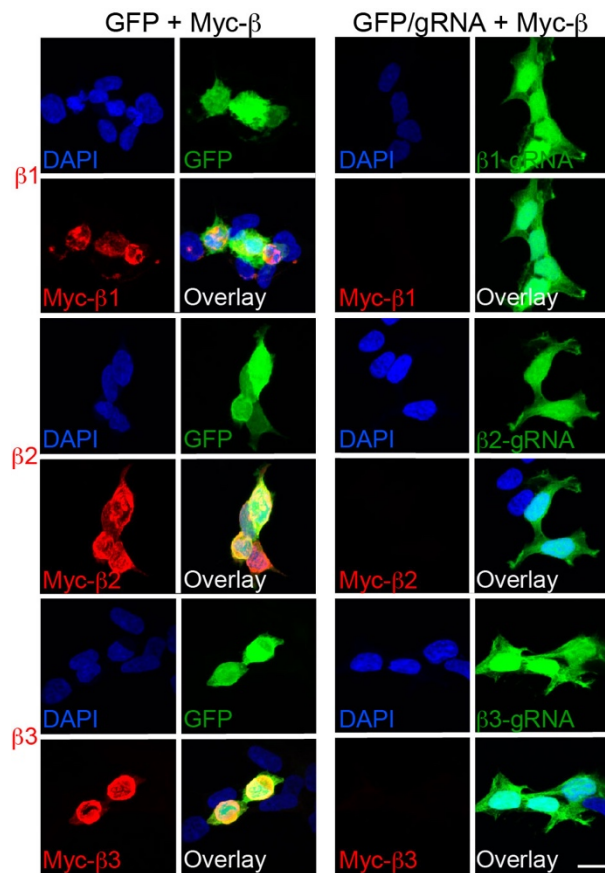

**Figure S2. Validation of gRNAs in HEK293T cells**

Validation of gRNA-mediated KO of the  $\beta 1$ , 2, 3 subunits in HEK293T cells using the CRISPR/Cas9 technique. HEK293T cells were transfected with single  $\beta 1$ , 2, 3 gRNAs candidate (also expressing GFP) or GFP alone together with  $\beta 1$ , 2 or 3 subunits, respectively. Confocal images showed the loss of  $\beta 1$ , 2 or 3 subunits in cells expressing both Myc-tagged  $\beta$  subunits and the respective gRNA candidate (N = 3). Scale bar, 5  $\mu\text{m}$ .

N represents the number of independent experiments.
